# Supplementary material for: Increased Vascular Permeability in the Bone Marrow Microenvironment Contributes to Disease Progression and Drug Response in Acute Myeloid Leukemia
Source: PubMed Central journal article supplement (PMC5598545; doi:10.1016/j.ccell.2017.08.001), 2017-09-11
Supplement: mmc1.pdf [file mmc1.pdf]

**Cancer Cell, Volume 32**

**Supplemental Information**

**Increased Vascular Permeability in the Bone Marrow  
Microenvironment Contributes to Disease Progression  
and Drug Response in Acute Myeloid Leukemia**

**Diana Passaro, Alessandro Di Tullio, Ander Abarrategi, Kevin Rouault-Pierre, Katie Foster, Linda Ariza-McNaughton, Beatriz Montaner, Probir Chakravarty, Leena Bhaw, Giovanni Diana, François Lassailly, John Gribben, and Dominique Bonnet**

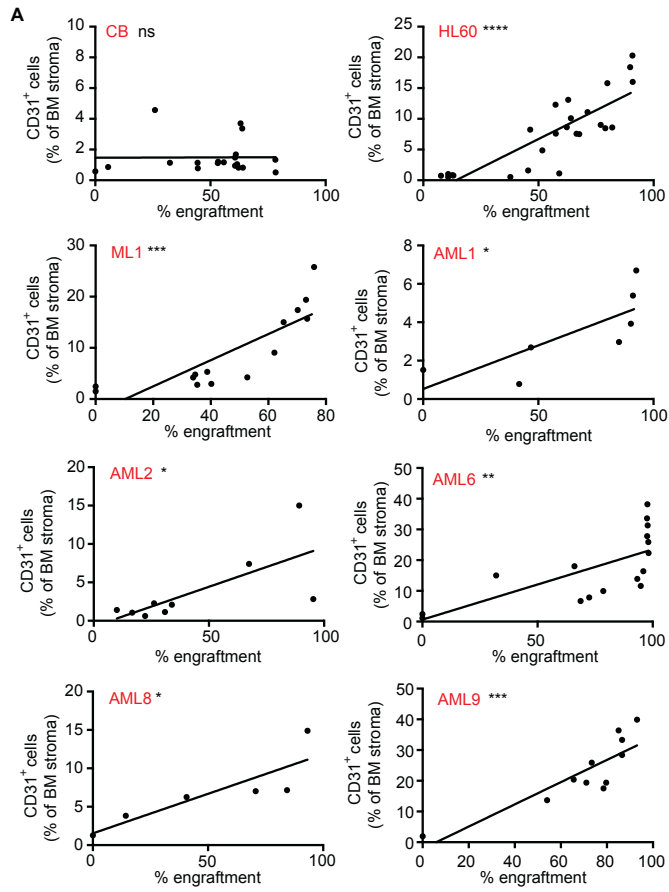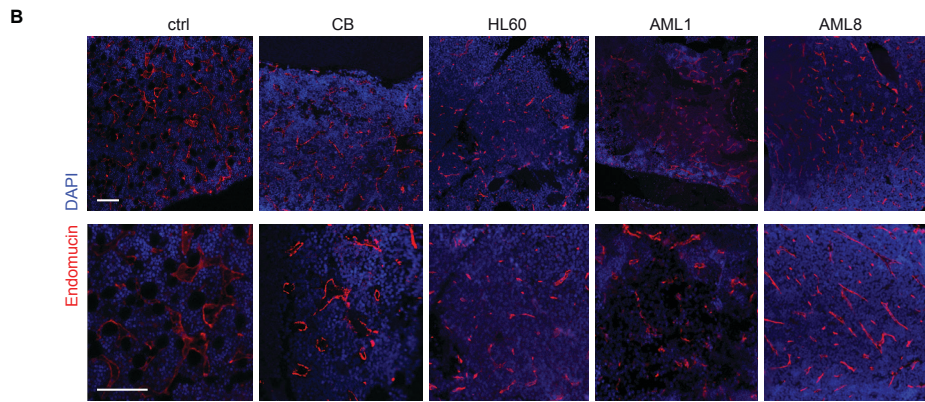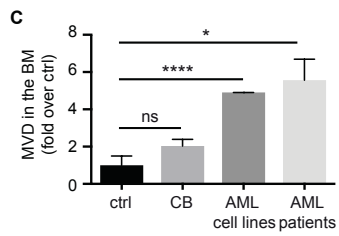

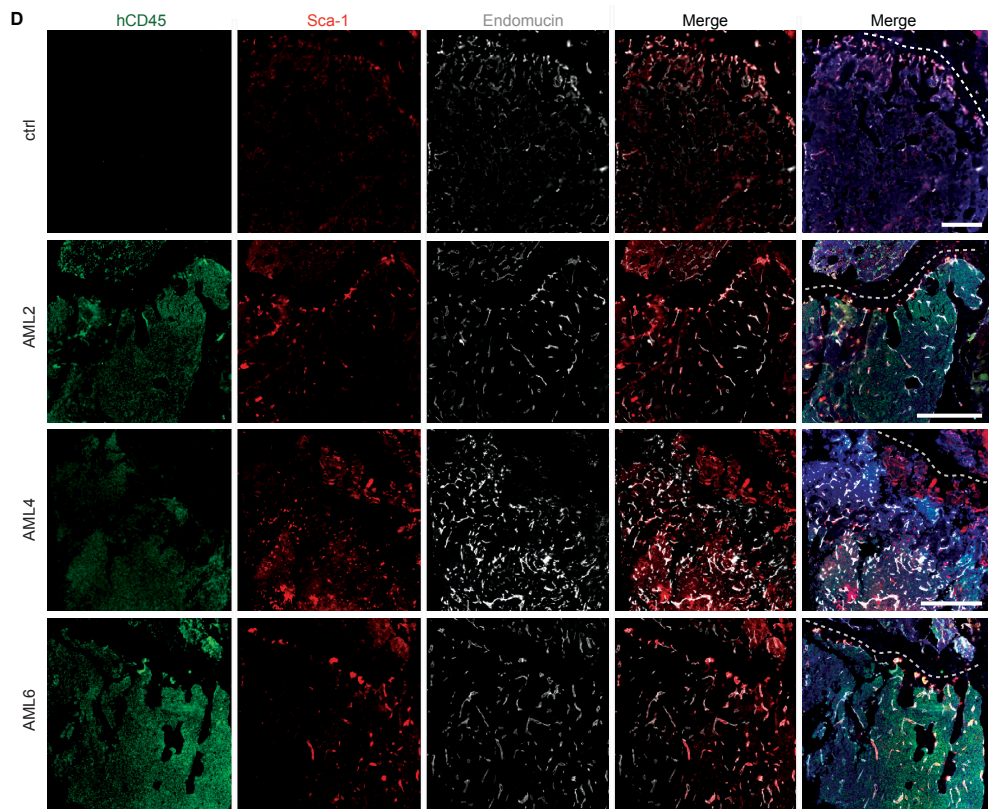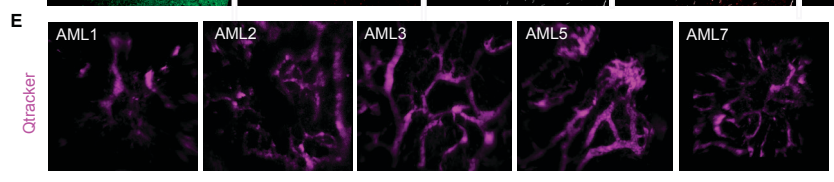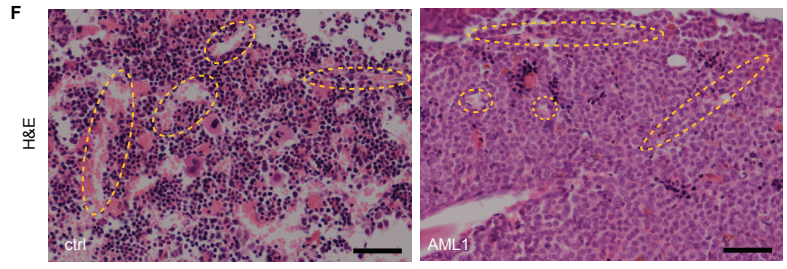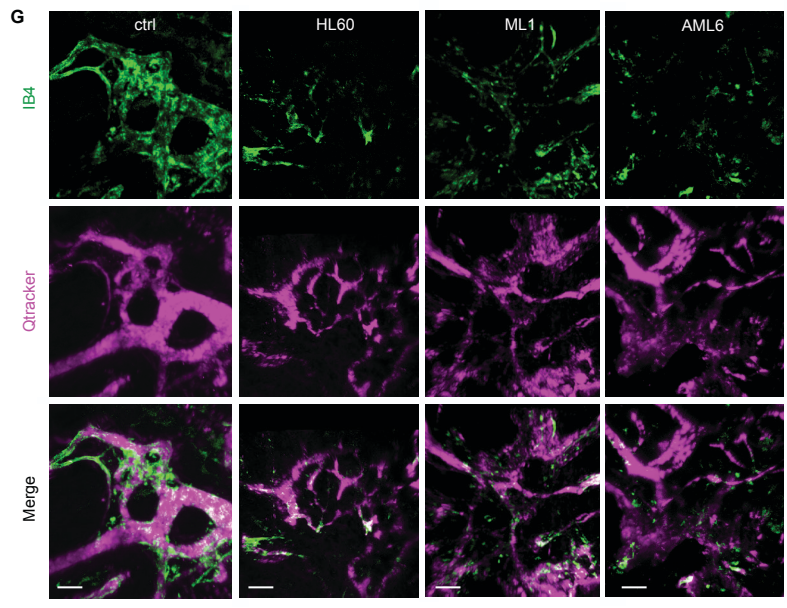

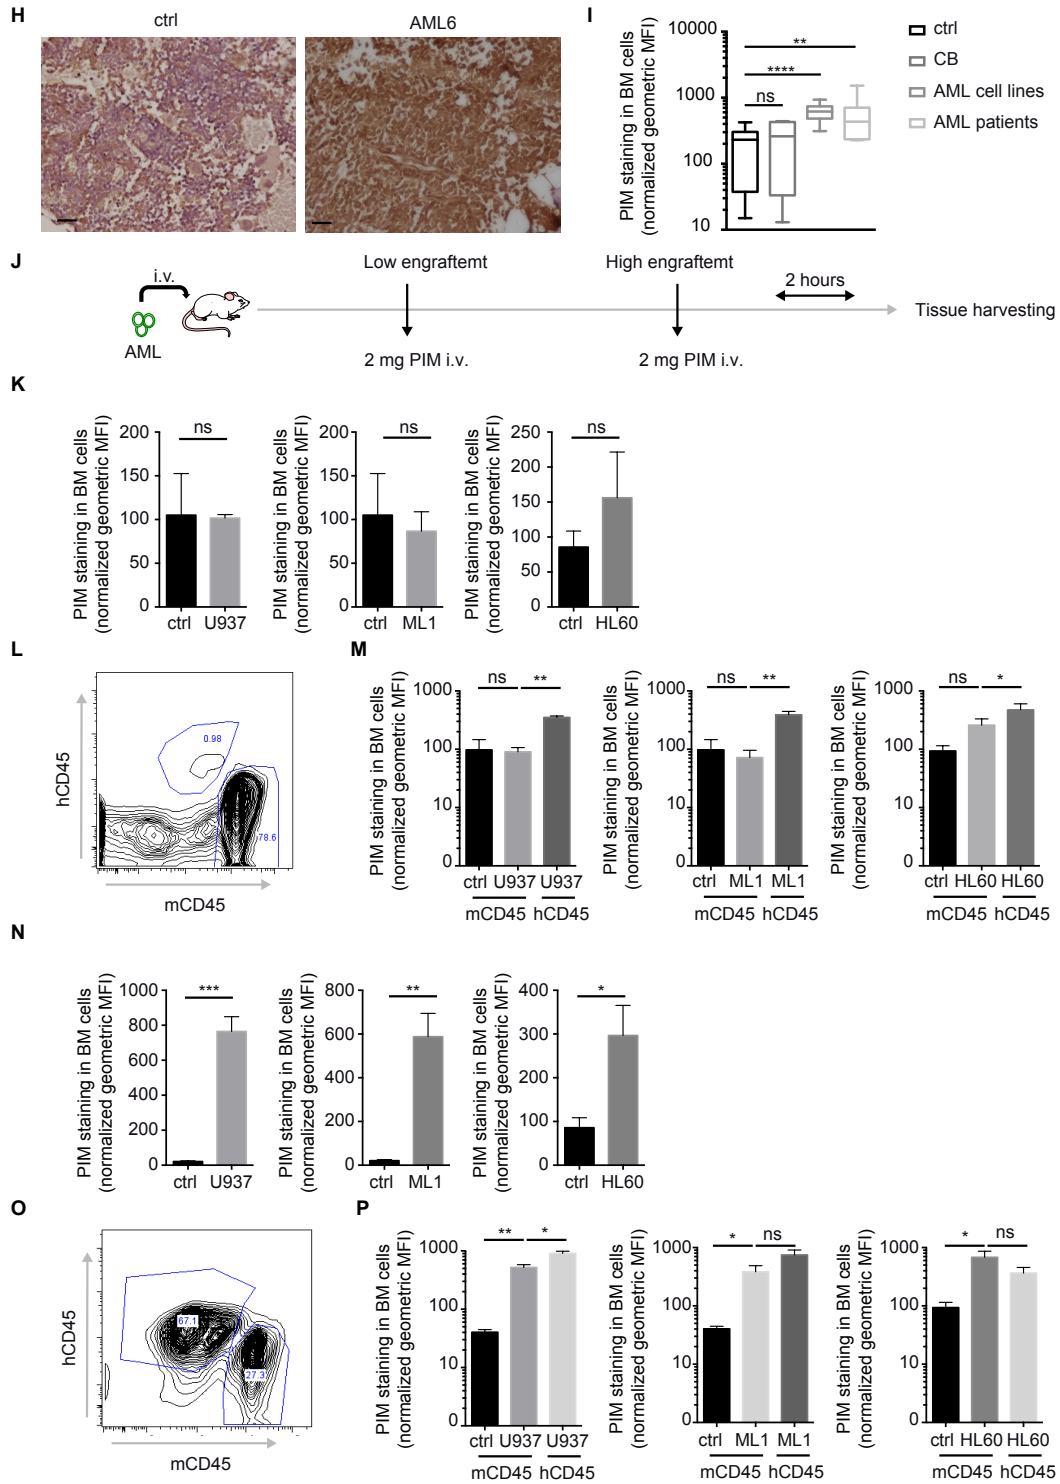

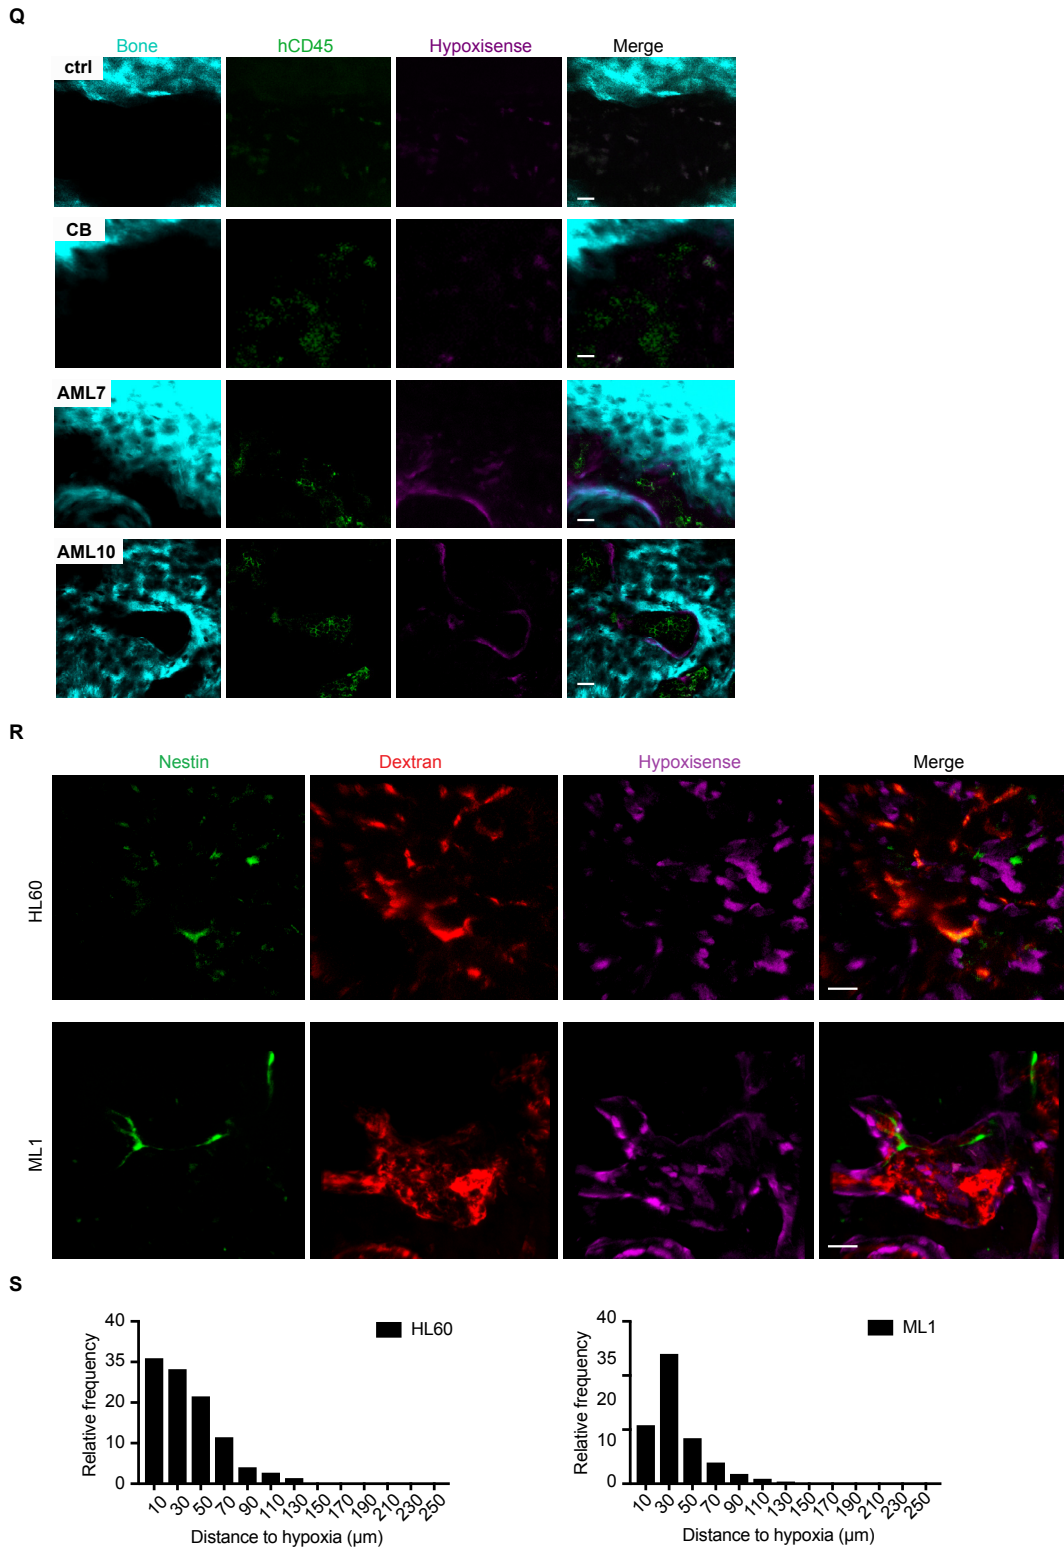

**Figure S1. Related to Figure 1. AML derived alteration of the BM vascular architecture and function. (A)** Quantification of CD31<sup>+</sup> endothelial cells in the BM (shown as % of CD45<sup>+</sup>Ter119<sup>-</sup> BM cells) in correlation with the human normal or leukemic engraftment, as depicted. Linear regression is shown. **(B)** Immunofluorescence images of fixed long bones showing endomucin (red)

vasculature of non-transplanted mice or mice transplanted with CB derived HSPCs (CB), human HL60 cells or AML patient-derived cells, as depicted. Nuclei are stained with DAPI (blue) Bars represent 200  $\mu\text{m}$ . **(C)** Microvascular density (MVD) quantified via endomucin staining in the BM of non-transplanted mice (ctrl) and mice transplanted with CB-derived HSPCs (CB) or human AML patients' derived samples. Ctrl n=5; CB n=11; AML cell lines n=7; AML patients (AML1, 6) n=9. Data are shown as mean  $\pm$  s.e.m. **(D)** Immunofluorescence images of fixed long bones of non-transplanted mice or mice transplanted with AML patient-derived samples, showing endomucin (white) and Sca-1 (red) vasculature in association with leukemic cells (hCD45, green). Nuclei are stained with DAPI (blue). Bars represent 500  $\mu\text{m}$ . **(E)** Representative 3D reconstruction of BM vasculature of the calvarium of mice transplanted with AML patient-derived samples, as depicted, imaged via 2P microscopy 1 min after injection of 655-conjugated NT-Qtracker as vessel pooling agent. Data are representative of 5 independent AML derived PDX done in triplicates. Bars represent 70  $\mu\text{m}$ . **(F)** H&E staining of long bones of non-transplanted mice (ctrl) or mice transplanted with AML1 patient-derived cells. Yellow circles indicate vessel lumen. Bars represent 50  $\mu\text{m}$ . **(G)** Representative 3D reconstruction of BM vasculature of the calvarium of non-transplanted mice (ctrl) or AML xenografts, as depicted, imaged via 2P microscopy. IB4 (green) labeling of endothelial cells represents vascular perfusion, and Qtracker (purple) labels the vascular tree. Data are representative of at least 9 replicates per group. Bars represent 70  $\mu\text{m}$ . **(H)** Representative IHCs showing the hypoxic staining via hypoxiprobe of long bones of non-transplanted mice (ctrl) and mice transplanted with AML6 patient-derived cells, as depicted. Bars represent 50  $\mu\text{m}$ . **(I)** Hypoxiprobe staining of BM cells isolated from non-transplanted mice (ctrl) and mice transplanted with CB-derived HSPCs (CB) or AML cell lines or patient-derived samples, as depicted. Ctrl n=14; CB n=6; AML cell lines n=9; AML patients n=11. Data are shown as Whiskers min to max plots, the line inside the box representing the mean, the top and the bottom line representing the 75% and 25% percentiles, respectively, and the lines above and below the box representing the S.D. **(J)** Schematic of the experiment: Mice engrafted with human AML cells were assessed for BM engraftment. At specific time points (low and high engraftment), 2 mg of hypoxiprobe were injected intravenously 2-hours prior sacrifice. Bones were retrieved and hypoxiprobe intracellular adducts were measured either via IHC or intracellular flow cytometry staining. **(K)** Low engraftment: hypoxiprobe staining in BM cells of non-transplanted mice or mice transplanted with human AML cell lines, as depicted; n=3 per condition. Data are shown as mean  $\pm$  s.e.m. **(L)** Flow cytometry gating strategy. **(M)** Hypoxiprobe staining in different populations of BM cells in mice sacrificed at low leukemic engraftment; n=3 per condition. Data are shown as mean  $\pm$  s.e.m. **(N)** High engraftment: Hypoxiprobe staining in BM cells of non-transplanted mice or mice transplanted with human AML cell lines, as depicted; n=3 per condition. Data are shown as mean  $\pm$  s.e.m. **(O)** Flow cytometry gating strategy. **(P)** Hypoxiprobe staining in different populations of BM cells in mice sacrificed at high leukemic engraftment; n=3 per condition. Data are shown as mean  $\pm$  s.e.m. **(Q)** Representative z-stacks of BM hypoxia imaged via intravital microscopy using the hypoxisense probe together with bone (SHG) and hCD45<sup>+</sup> cells in non-transplanted mice or mice transplanted with CB-derived HSPCs (CB) or AML patient-derived samples, as

depicted. Bars represent 30  $\mu\text{m}$ . **(R)** Representative 3D reconstruction of BM hypoxia imaged via intravital microscopy using the hypoxisense probe together with vasculature (Dextran) and Nestin<sup>+</sup> cells in mice transplanted with AML cell lines, as depicted. Bars represent 50  $\mu\text{m}$ . **(S)** Distribution and relative frequency of vessel distances to hypoxic areas in the BM of non-transplanted mice (ctrl) or mice transplanted with AML cell lines, as depicted. P values: ns: non-significant; \*  $p < 0.05$ ; \*\*  $p < 0.01$ ; \*\*\*  $p < 0.001$ .

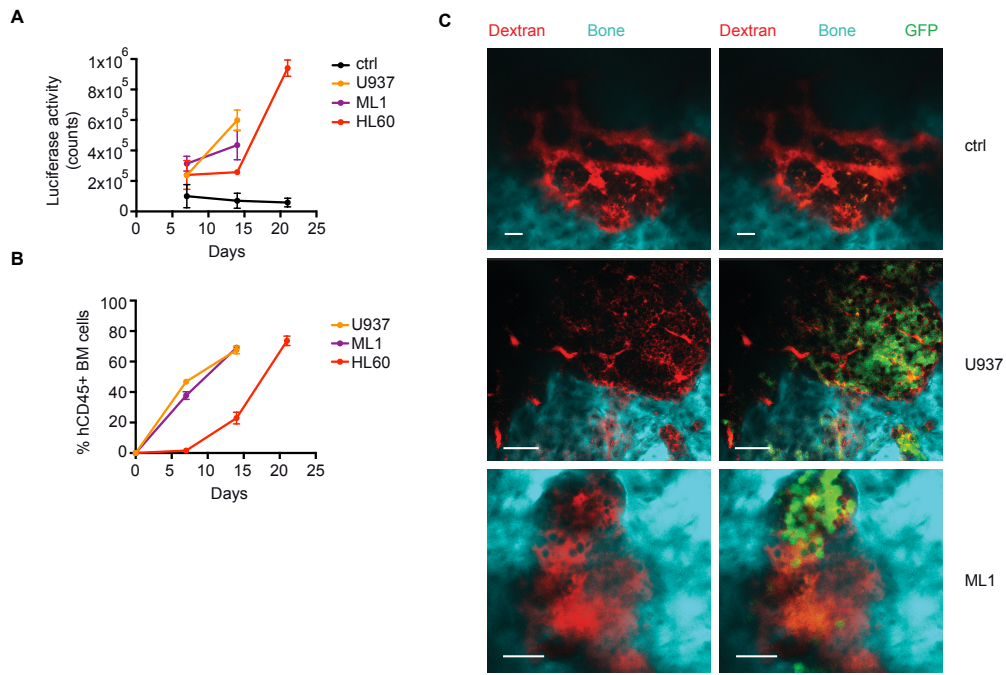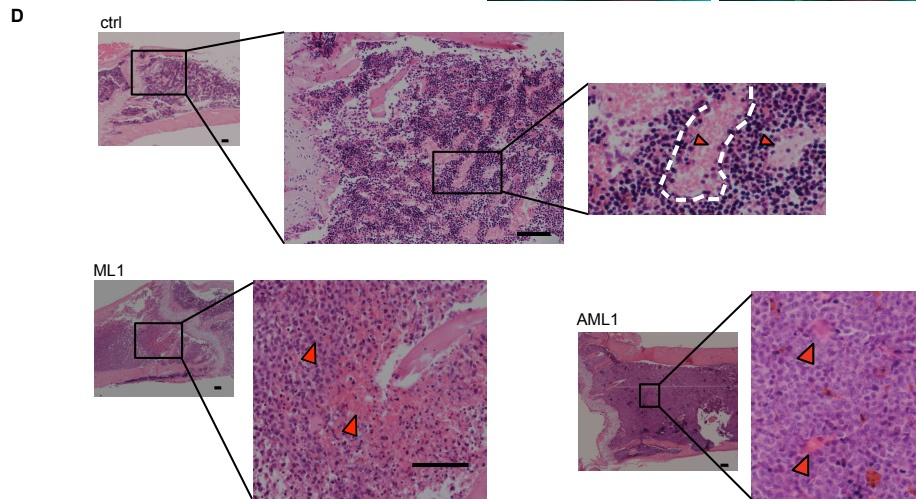

$$\text{Leakiness} = \frac{I_{\text{Dex}}^{\text{OUT}}}{I_{\text{Dex}}^{\text{IN}}}$$



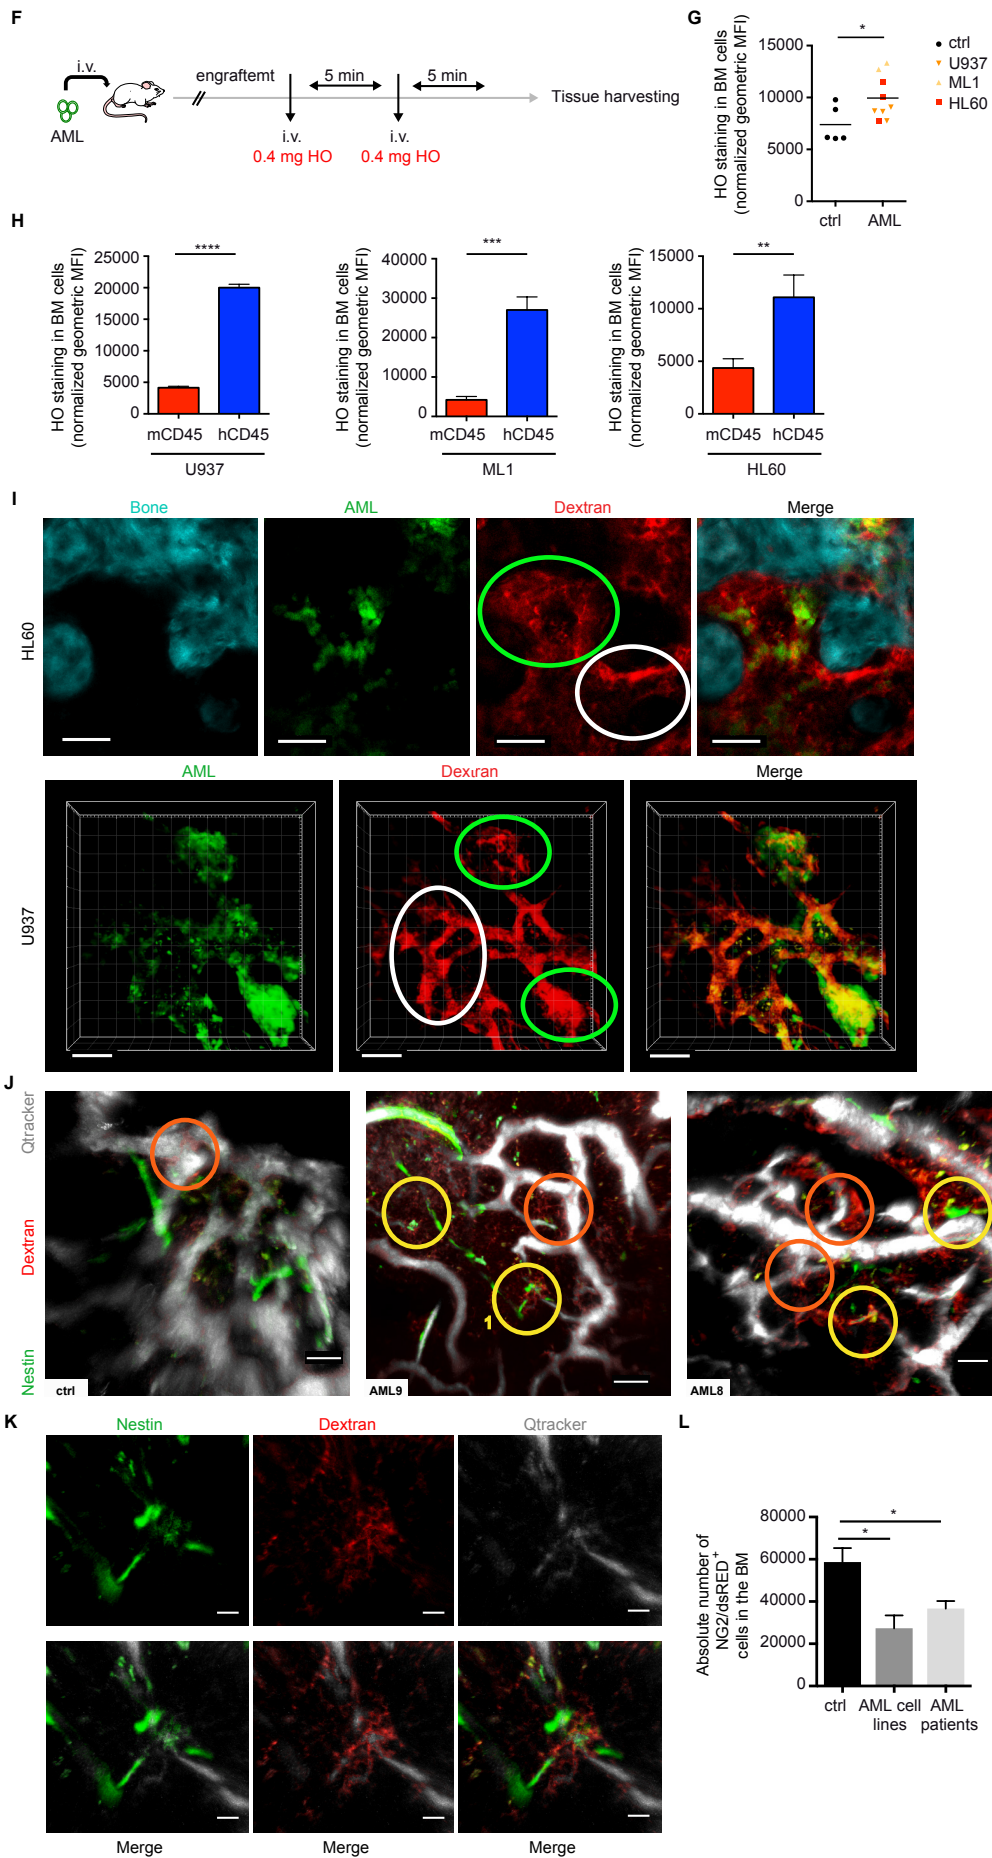

**Figure S2. Related to Figure 2. AML engraftment increases vascular permeability in the BM. (A)** Kinetics of BM engraftment shown as luciferase activity in mice (n=3 per condition) transplanted with human AML cell lines. Data are shown as mean  $\pm$  s.e.m. **(B)** Kinetics of BM engraftment shown as percentage of hCD45<sup>+</sup> cells in the BM of mice (n=3 per condition) transplanted with human AML cell lines. Data are shown as mean  $\pm$  s.e.m. **(C)** Representative z-stack of the TRITC-Dextran labeled BM vasculature in the calvarium of non-transplanted control or from mice transplanted with GFP-U937 and GFP-ML1 cells. Data are representative of triplicates. Bars represent 30, 70, 50  $\mu$ m for ctrl, U937 and ML1, respectively. **(D)** H&E staining of the long bones of non-transplanted mice (ctrl) or mice transplanted with AML xenografts, as depicted. Red arrows point to erythrocytes. Bars represent 50  $\mu$ m. **(E)** The quantification strategy of bone marrow vascular permeability is shown. The volumetric signal derived from the 655-conjugated Qtracker (a) is used to create an isosurface of the vascular tree in the BM (b). This isosurface is used to segment the volumetric signal derived from the Dextran (c) inside and outside the vasculature. The leakiness is shown as a ratio OUT/IN (d). The formula used to measure the leakiness is shown ( $I$  = intensity signal). Bars represent 100  $\mu$ m. **(F)** Schematic of the experiment: HL60, ML1 and U937 human AML cells were injected intravenously into NSG mice. Once engraftment confirmed, two consecutive intravenous injections of 0.4 mg of Hoechst (HO) were performed at 5 mns interval. Mice were sacrificed 5 mns after the last injection, and BM cells retrieved in cold PBS containing inhibitors of HO expulsion. **(G)** HO signal was analyzed by flow cytometry in BM cells of non-transplanted mice or mice engrafted with AML cell lines, as depicted (normalized geometric MFI). Bars represent mean. **(H)** HO signal in murine CD45<sup>+</sup> and human CD45<sup>+</sup> cells in the BM of mice detailed in B; n=3 per condition. Data are shown as mean  $\pm$  s.e.m. **(I)** Representative Z-stacks (HL60) and 3D reconstruction (U937) of the BM vasculature in the calvarium of mice after injection of TRITC-Dextran vessel pooling agent. SHG: Second harmonic signal generated by the bone. White ellipses indicate non-engrafted areas; green ellipses indicate AML engrafted areas. Bars represent 50  $\mu$ m (HL60) and 100  $\mu$ m (U937). **(J)** Representative 3D reconstruction of the BM vasculature in the calvarium of non-transplanted mice or AML xenografts, as depicted, after injection of Qtracker and Dextran. Nestin-GFP signal (green) labels arteriolar vasculature. Orange and yellow circles indicate Nestin<sup>-</sup> and Nestin<sup>+</sup>, respectively, leaky vessels. Bars represent 50  $\mu$ m. **(K)** Higher magnification of area n1 highlighted in (J). Bars represent 10  $\mu$ m. **(L)** Absolute number of NG2-DSRED<sup>+</sup> cells in the BM of non-transplanted mice (ctrl, n=3) or mice engrafted with human AML cell lines (HL60 n=2; ML1 n=3) or patient-derived samples (AML6, n=6; AML9, n=5). Bars represent mean  $\pm$  s.e.m. p values: \*p<0.05; \*\*\* p< 0.001; \*\*\*\* p<0.0001.

**Table S1. Related to Figure 3.** BM biopsies obtained from AML patients and donors with normal BM

| PATIENT ID | CYTOGENETICS                   | AGE | GENDER | NPM/FLT3 | CLINICAL INFORMATION             |
|------------|--------------------------------|-----|--------|----------|----------------------------------|
| AML11      | T(4;17;15;7)                   | 34  | FEMALE | WT/MUT   | n.d.                             |
| AML12      | TRISOMY 8                      | 44  | MALE   | WT/WT    | M1                               |
| AML13      | T(15;17)                       | 22  | FEMALE | WT/WT    | M3                               |
| AML14      | n.d.                           | 46  | FEMALE | WT/WT    | M1                               |
| AML15      | T(15;17) +                     | 39  | FEMALE | WT/WT    | M3                               |
| AML16      | PLUS X                         | 30  | FEMALE | WT/WT    | M0                               |
| AML17      | NORMAL                         | 65  | FEMALE | WT/WT    | 2ND AML                          |
| AML18      | NORMAL                         | 55  | FEMALE | WT/WT    | M0                               |
| AML19      | NORMAL                         | 37  | FEMALE | WT/MUT   | M5                               |
| AML20      | NORMAL                         | 62  | MALE   | WT/WT    | 2ND AML                          |
| AML21      | NORMAL                         | 43  | MALE   | WT/WT    | TRIPHENOTYPIC: B, T, M           |
| AML22      | NORMAL                         | 49  | FEMALE | WT/MUT   | M1                               |
| AML23      | NORMAL                         | 54  | MALE   | WT/WT    | M2                               |
| AML24      | NORMAL                         | 63  | MALE   | WT/WT    | M5                               |
| AML25      | NORMAL                         | 64  | MALE   | MUT/MUT  | M0                               |
| AML26      | T(15;17) +                     | 41  | FEMALE | WT/WT    | M3                               |
| AML27      | NORMAL                         | 69  | MALE   | WT/WT    | M2                               |
| AML28      | INS(10;11)MLL(11Q23)REARRANGED | 31  | MALE   | WT/MUT   | M1                               |
| AML29      | TRISOMY 8                      | 68  | MALE   | WT/MUT   | M2                               |
| HC1        | -                              | 34  | MALE   | -        | DLBC - Stage IE                  |
| HC2        | -                              | 45  | MALE   | -        | DLBC - Stage IE - chest wall     |
| HC3        | -                              | 86  | FEMALE | -        | DLBC - Stage II                  |
| HC4        | -                              | 69  | MALE   | -        | DLBC - Stage IIE - THYROID       |
| HC5        | -                              | 78  | MALE   | -        | DLBC - Stage IE - TESTES         |
| HC6        | -                              | 40  | FEMALE | -        | BMT donor - B-thalassaemia trait |
| HC7        | -                              | 27  | FEMALE | -        | BMT donor - B-thalassaemia trait |
| HC8        | -                              | 37  | FEMALE | -        | BMT donor - Sickle cell trait    |

HC1 to 5 were used as healthy biopsies as they show no BM infiltration of malignant cells.

**Table S2. Related to Figure 3. Treatment protocols of patients in Table S1**

| AML ID | Treatment protocol                                                                                                                                                                  | Alive |
|--------|-------------------------------------------------------------------------------------------------------------------------------------------------------------------------------------|-------|
| AML11  | Induction: AraC, daunorubicin and etoposide                                                                                                                                         | yes   |
| AML12  | Induction: ifosfomide, carboplatin and etoposide (ICE) and AraC                                                                                                                     | yes   |
| AML13  | Induction: AraC, daunorubicin and etoposide                                                                                                                                         | no    |
| AML14  | Induction: AraC, daunorubicin and etoposide                                                                                                                                         | yes   |
| AML15  | Induction: AraC, daunorubicin and etoposide<br>Consolidation: all trans retinoic acid, 6-mercaptopurine and methotrexate                                                            | yes   |
| AML16  | Induction 1: ifosfomide, carboplatin and etoposide (ICE)<br>Induction 2: daunorubicin and AraC                                                                                      | no    |
| AML17  | Induction: idarubicin and AraC                                                                                                                                                      | no    |
| AML18  | Induction: ifosfomide, carboplatin and etoposide (ICE)                                                                                                                              | yes   |
| AML19  | Induction: AraC, daunorubicin and etoposide                                                                                                                                         | no    |
| AML20  | Induction: Daunorubicin and AraC + haematopoetic stem cell transplant                                                                                                               | yes   |
| AML21  | Induction 1: German multicentre acute lymphoblastic leukaemia trial<br>Induction 2: etoposide and AraC<br>Relapse: intrathecal chemotherapy to treat central nervous system relapse | no    |
| AML22  | Induction: AraC, daunorubicin and etoposide + Gemtuzumab ozogamacin<br>Relapse 1: Low dose AraC<br>Replapse 2: daunorubicin and AraC                                                | no    |
| AML23  | Induction: AraC, daunorubicin and etoposide                                                                                                                                         | no    |
| AML24  | Induction: daunorubicin and AraC + all trans retinoic acid                                                                                                                          | yes   |
| AML25  | Induction: daunorubicin and AraC + Gemtuzumab ozogamacin                                                                                                                            | yes   |
| AML26  | Induction: all trans retinoic acid and arsenic trioxide                                                                                                                             | yes   |
| AML27  | Induction: Azacytidine + low dose AraC<br>Consolidation: low dose AraC                                                                                                              | no    |
| AML28  | Induction 1: AraC, daunorubicin and etoposide                                                                                                                                       | no    |
| AML29  | Induction: Azacytidine                                                                                                                                                              | no    |

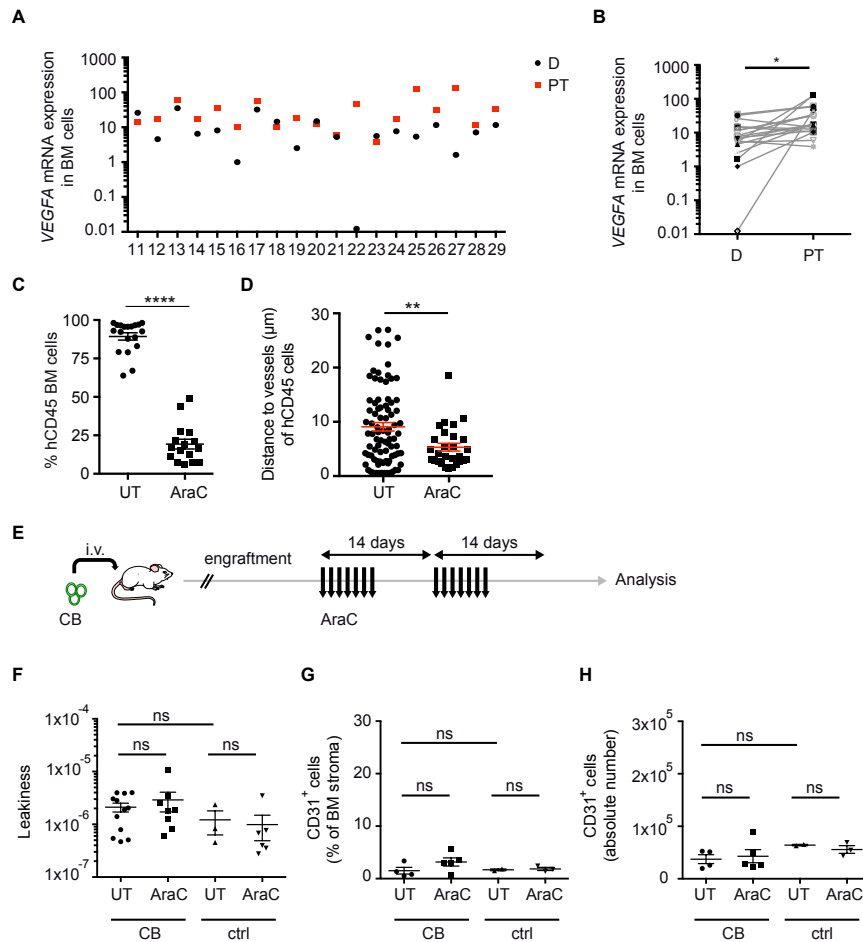

**Figure S3. Related to Figure 3. Persistence of increased vascular permeability after chemotherapy.** (A) *VEGFA* mRNA relative expression in BMC derived from AML patients at diagnosis (D, black circles) and post-treatment (PT, red squares). (B) Comparison of the level of *VEGFA* mRNA relative expression in BMC of each AML patients at diagnosis and post-treatment. (C) Percentage of human CD45<sup>+</sup> leukemic cells in the BM of mice described, treated with AraC or control solvent. AML patients tested: AML6, 7, 8, 9. UT n=17; AraC n=16. Each dot represents one mouse. Bars represent mean  $\pm$  s.e.m. (D) Measurement of hCD45<sup>+</sup> cell distribution in relation to vasculature in the calvaria BM of mice transplanted with AML6 patient-derived cells, and treated or not with AraC, as depicted. Each dot represents one cell. Bars represent mean  $\pm$  s.e.m. UT n=86; AraC n=28. (E) Schematic of the experiment. Non-transplanted mice or mice engrafted with human CD34<sup>+</sup> cells were treated with 10 mg/kg/day of AraC or solvent, administrated intraperitoneally for two alternated weeks. Vessel-pooling agents were administrated intravenously. Mice were sacrificed 10 min later and calvaria imaged via 2P microscopy. (F) Vascular leakiness in the BM of mice detailed in A; n=3 or more replicates. Bars represent mean  $\pm$  s.e.m. (G) Quantification of CD31<sup>+</sup> endothelial cells in the BM (shown as % of CD45<sup>-</sup> Ter119<sup>-</sup> BM cells) of mice detailed in A. Bars represent mean  $\pm$  s.e.m. (H) Absolute number of CD31<sup>+</sup> endothelial cells in the BM (2 femurs, 2 tibias and 2 iliac crests) of mice detailed in A, as depicted. Bars represent mean  $\pm$  s.e.m. p values: ns: non-significant; \* p<0.05; \*\* p<0.01; \*\*\* p<0.001.

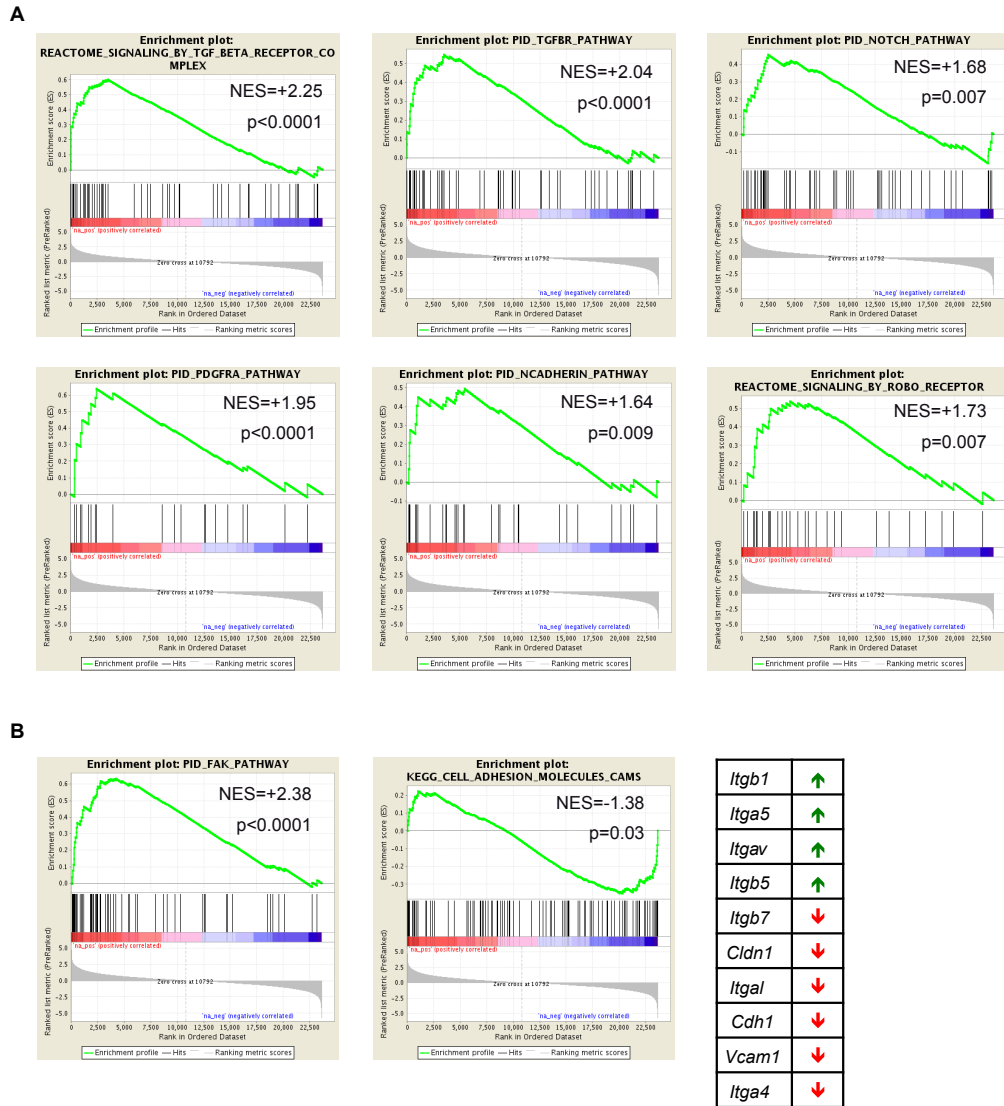

**Figure S4. Related to Figure 4. AML-induced transcriptional signature in BM ECs. (A)** Enrichment plots for Pathways from GSEA between CB and AML groups using RNA-seq gene expression data indicate enrichment of different pro-angiogenic pathways in endothelial cells from AML group. Normalized Enrichment Score (NES) and nominal p value are shown. **(B)** Enrichment plots for Pathways from GSEA between CB and AML groups using RNA-seq gene expression data indicate upregulation of FAK pathway (top) and downregulation of cell adhesion molecules (CAMs) pathway (bottom) in endothelial cells from the AML group. Normalized Enrichment Score (NES) and nominal p values are shown. On the right, specific deregulated adhesion molecules.

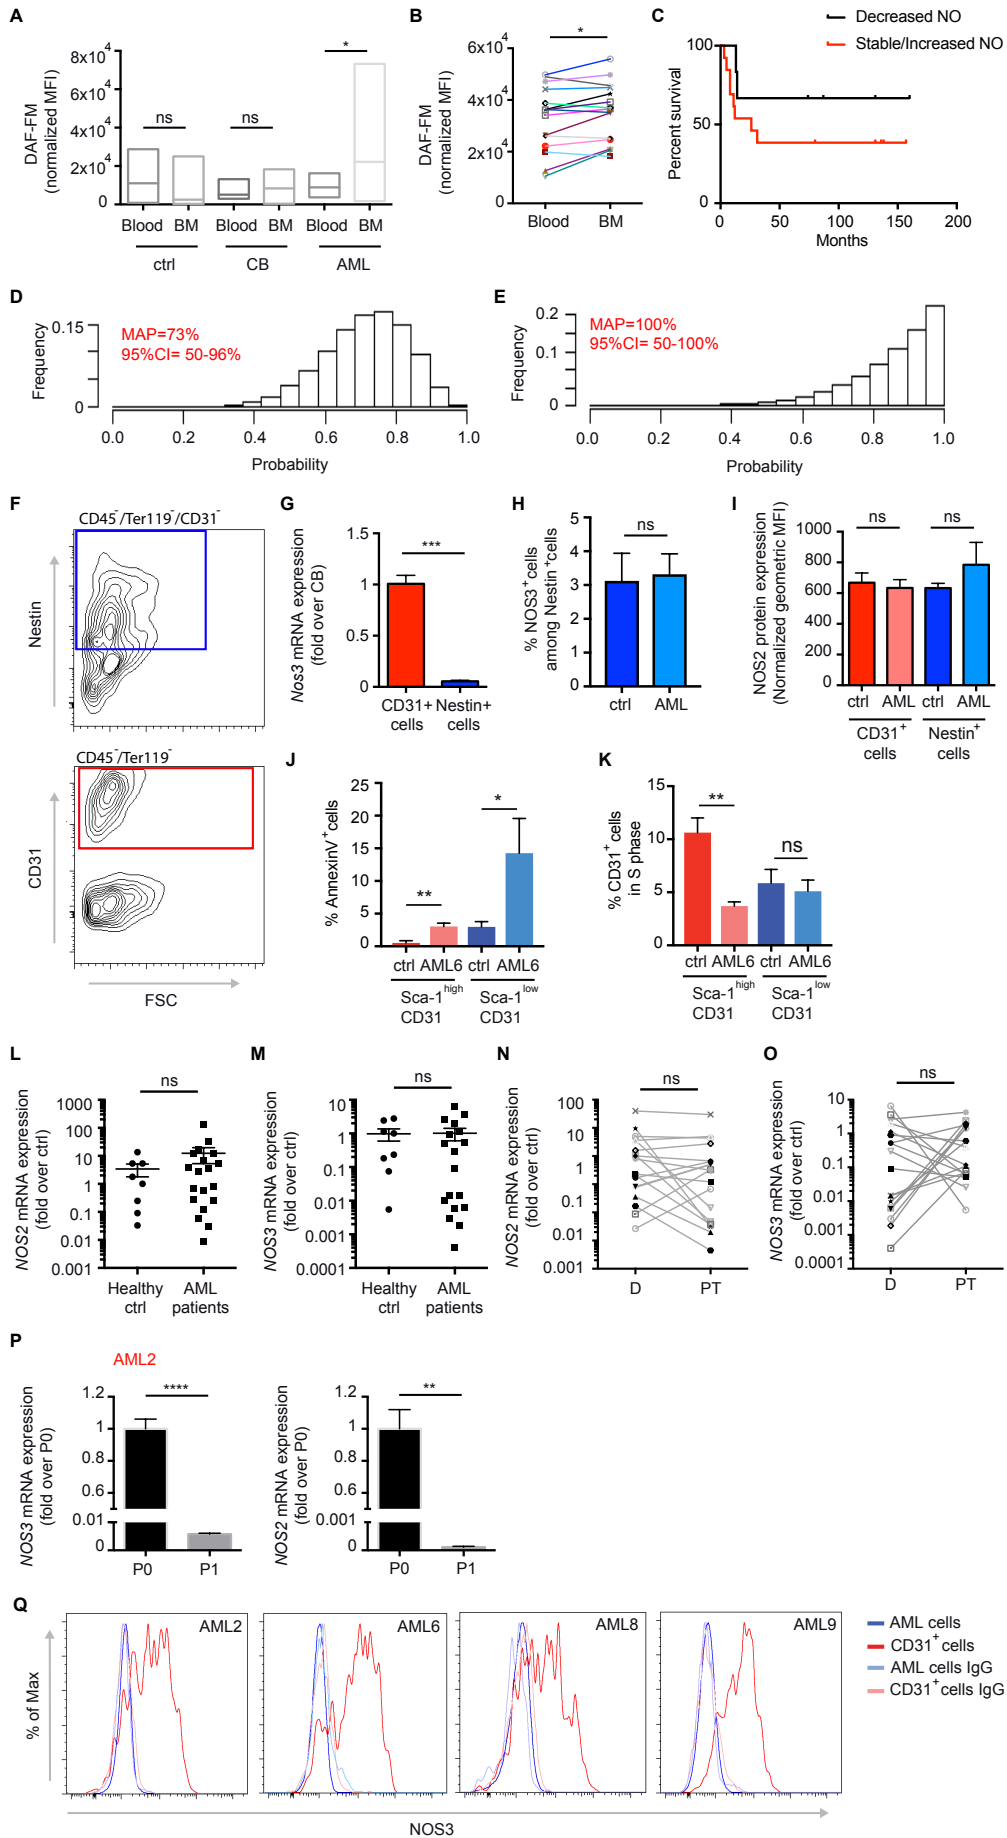

**Figure S5. Related to Figure 5. AML engraftment is associated to increased nitric oxide levels in the BM. (A)** Nitric oxide levels in the BM and peripheral blood cells of non-transplanted mice (ctrl, n=13 and n=9 respectively), mice transplanted with CB derived CD34<sup>+</sup> cells (CB, n=24 and n=7 respectively) and AML patients' derived samples (AML2, 6, 9; n=10 and n=8 respectively), as depicted. Data are shown as min to max boxplots, the line inside the box representing the mean. **(B)** Nitric oxide levels in peripheral blood and BM cells of AML patients at diagnosis. Each point represents one patient; n=19. **(C)** Kaplan-Meier survival curve of patients stratified based on the NO level normalization parameter. **(D)** Estimated distribution of probabilities of stable/increased NO levels in the BM in case of therapy failure, analyzed in our entire patient cohort (n=19) or **(E)** analyzed in intermediate risk group patients from our cohort (n=9). MAP= maximum a posteriori estimate. CI95= 95% credible interval. Bayesian inference. **(F)** Gating strategy in the CD45<sup>-</sup>Ter119<sup>-</sup> BM stromal compartment for selecting Nestin<sup>+</sup> (top, blue box) and CD31<sup>+</sup> (down, red box) cells. **(G)** *Nos3* expression analyzed by qRT-PCR in CD31<sup>+</sup> and Nestin<sup>+</sup> cells BM cells, as depicted. Data are shown as mean  $\pm$  s.e.m. **(H)** NOS3 protein expression in Nestin<sup>+</sup> mesenchymal cells in the BM of non-transplanted mice or AML xenografts, quantified by flow cytometry. Data are shown as mean  $\pm$  s.e.m. **(I)** NOS2 protein expression analyzed by flow cytometry (Geometric MFI) in CD31<sup>+</sup> and Nestin<sup>+</sup> BM cells retrieved from non-transplanted mice or mice engrafted with AML patients-derived samples (AML6, 8 and 9). Data are shown as mean  $\pm$  s.e.m. **(J)** % of apoptotic cells among different populations of BM-derived ECs, as depicted. Data are shown as mean  $\pm$  s.e.m. **(K)** % cells in the S phase of cell cycle among different populations of BM-derived ECs, as depicted. Data are shown as mean  $\pm$  s.e.m. **(L, M)** *NOS2* (L) and *NOS3* (M) expression analyzed by qRT-PCR in the BM of healthy controls (n=8) and in AML patients (n=19) from our cohort (Table S1). Data are shown as mean  $\pm$  s.e.m. **(N, O)** *NOS2* (N) and *NOS3* (O) expression analyzed by qRT-PCR in the BM of AML patients (n=19) before and after therapy. **(P)** *NOS3* (left) and *NOS2* (right) expression analyzed by qRT-PCR in AML2 patient's derived cells (P0) and AML2 patient's derived xenografted cells (P1), as depicted. Data are shown as mean  $\pm$  s.e.m. **(Q)** NOS3 protein expression measured via flow cytometry in CD31<sup>+</sup> and AML cells in the BM of AML xenografts, as depicted. Data are representative of triplicates. P values: ns: non-significant; \*p<0.05; \*\* p<0.01;\*\*\* p<0.001.



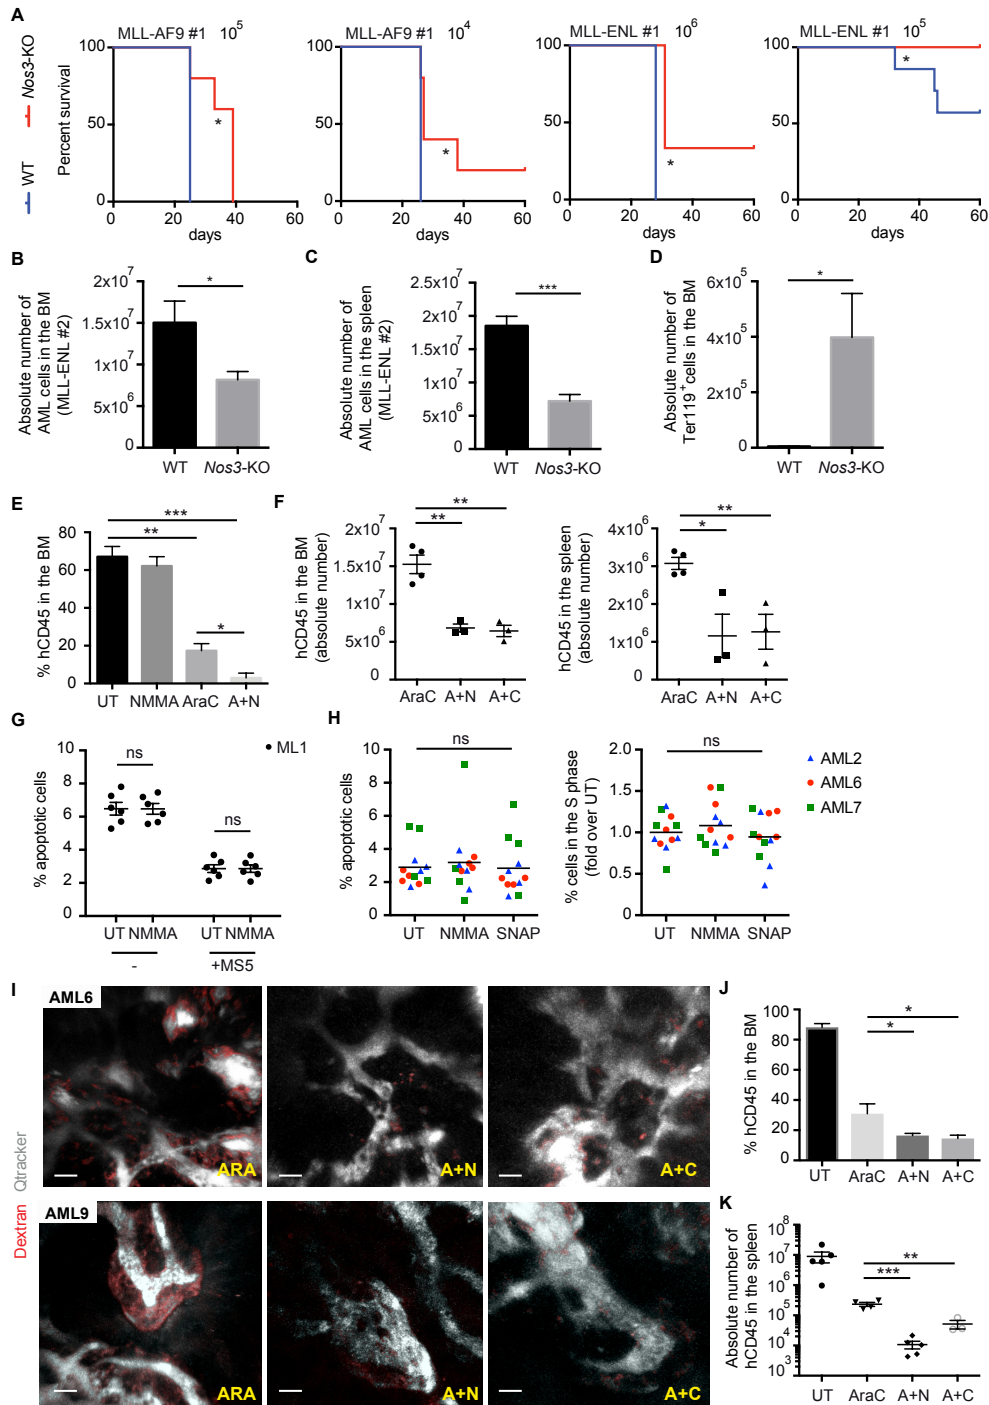

**L**

| Patient sample | Treatment group | BM engraftment<br>(% of hCD45 cells) ± s.e.m. | Spleen engraftment<br>(% of hCD45 cells) ± s.e.m. |
|----------------|-----------------|-----------------------------------------------|---------------------------------------------------|
| AML 6          | UT              | 96.38 ± 0.423; n=3                            | 71.53 ± 3.135; n=3                                |
| AML 6          | NMMA            | 95.83 ± 0.088; n=3                            | 56.2 ± 1.418; n=3                                 |
| AML 6          | CAV             | 95.08 ± 0.118; n=3                            | 41.47 ± 0.393; n=3                                |
| AML 6          | ARA             | 16.93 ± 1.01; n=3                             | 10.56 ± 2.878; n=3                                |
| AML 6          | A+N             | 7.043 ± 1.201; n=3                            | 6.86 ± 3.164; n=3                                 |
| AML 6          | A+C             | 5.758 ± 0.126; n=3                            | 3.183 ± 0.136; n=3                                |
| AML 9          | UT              | 88.22 ± 2.463; n=5                            | 70.56 ± 4.237; n=5                                |
| AML 9          | NMMA            | 89.38 ± 2.453; n=5                            | 77.48 ± 2.053; n=5                                |
| AML 9          | CAV             | 89.36 ± 4.63; n=5                             | 73.22 ± 4.475; n=5                                |
| AML 9          | ARA             | 30.97 ± 6.527; n=3                            | 48.87 ± 3.012; n=3                                |
| AML 9          | A+N             | 16.48 ± 1.433; n=5                            | 8.528 ± 2.541; n=5                                |
| AML 9          | A+C             | 14.54 ± 2.158; n=4                            | 25.85 ± 5.322; n=4                                |

**Figure S6. Related to Figure 6. Targeting vascular permeability cooperates with chemotherapy to improve AML treatment. (A)** Survival curve of mice of depicted genotypes transplanted with murine MLL-AF9 #1 (top) or MLL-ENL #1 (bottom) AML cells at different doses. MLL-AF9 #1:  $10^5$  WT n=3; *Nos3*-KO n=5.  $10^4$  WT n=3; *Nos3*-KO n=5; MLL-ENL #1:  $10^6$  WT n=3; *Nos3*-KO n=3;  $10^5$  WT n=7; *Nos3*-KO n=4;  $10^4$  WT n=3; *Nos3*-KO n=3. **(B)** Absolute number of MLL-ENL #2 tomato<sup>+</sup> leukemic cells in the BM of mice of depicted genotypes. Data are shown as mean  $\pm$  s.e.m. **(C)** Absolute number of tomato<sup>+</sup> MLL-ENL leukemic cells in the spleen of mice of depicted genotypes. Data are shown as mean  $\pm$  s.e.m. **(D)** Absolute of Ter119<sup>+</sup> BMC in mice of depicted genotypes engrafted with tomato<sup>+</sup> MLL-ENL leukemic cells. Data are shown as mean  $\pm$  s.e.m. **(E)** Human CD45<sup>+</sup> engraftment in the BM of mice engrafted with ML1 human AML cell line and treated with solvent (UT), NMMA alone, AraC alone, or combination of AraC with NMMA (A+N), as depicted; n=3. Data are shown as mean  $\pm$  s.e.m. **(F)** Absolute number of human CD45<sup>+</sup> cells in the BM (left) and the spleen (right) of mice engrafted with ML.1 treated with AraC alone, or combination of AraC with NMMA (A+N) or Cavtatin (A+C), as depicted; n=3 or more. Bars represent mean  $\pm$  s.e.m. **(G)** % of apoptotic of ML1 cells grown alone or in co-culture with MS-5 and treated or not with NMMA. Bars represents mean  $\pm$  s.e.m. Each dot represents a well. **(H)** % of apoptotic cells (left) and cells in the S phase (right) among AML primary patient-derived cells grown in co-culture with MS-5 and treated or not with NMMA and SNAP. Each dot represents one well. Bars represent mean. **(I)** Representative 3D reconstructions of the calvarium BM of mice transplanted with AML6 (top) and AML9 (bottom) patient-derived cells, treated with AraC alone or combination of AraC with NMMA or Cavtatin, as depicted, and imaged via 2P microscopy using 655-conjugated Qtracker and TRITC-Dextran as vessel pooling agents. Bars represent 30  $\mu$ m. **(J)** Percentage of Human CD45<sup>+</sup> engraftment in the BM of mice engrafted with patient-derived sample AML9 and treated as in Figure 6D; n=5 per condition. Data are shown as mean  $\pm$  s.e.m. **(K)** Absolute number of leukemic cells in the spleen of mice engrafted with AML9 patient-derived cells and treated or not with AraC, NMMA, Cavtatin or combination of AraC and NMMA or Cavtatin. Bars represent mean  $\pm$  s.e.m. **(L)** Multi-organ analysis of PDX described in Figure 6 and S6. P values: ns: non-significant; \*p<0.05; \*\* p<0.01; \*\*\* p<0.001; \*\*\*\*p<0.0001.

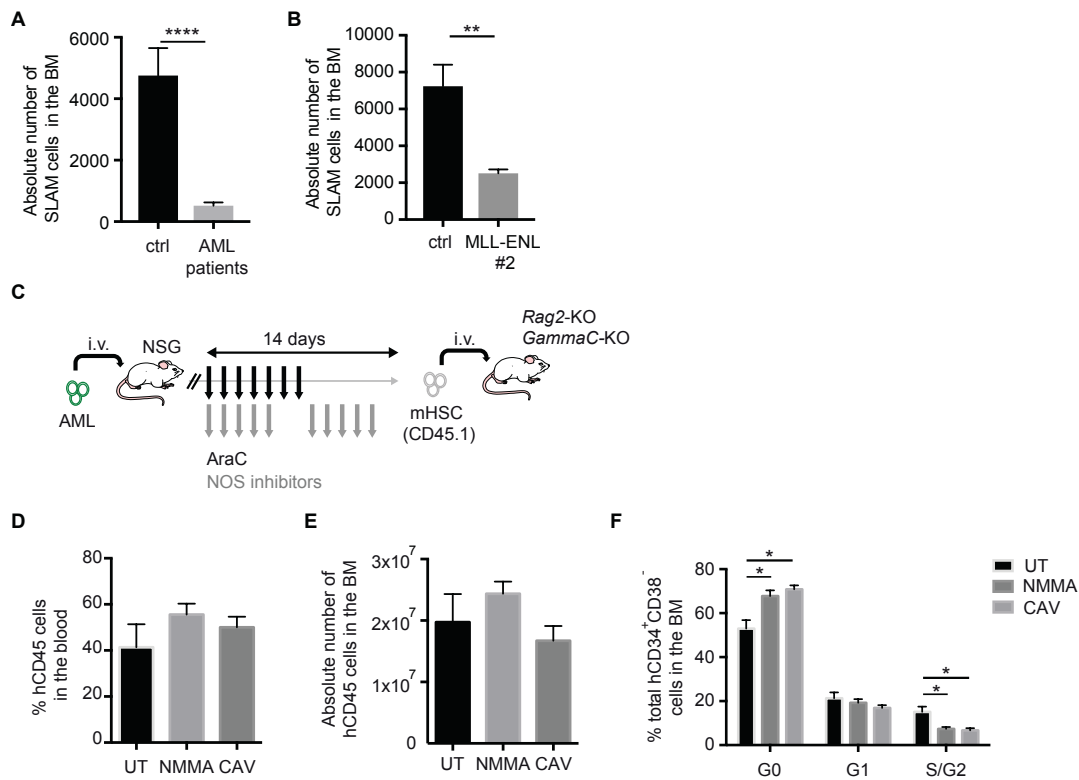

**Figure S7. Related to Figure 7. Targeting vascular permeability potentiates HSPC function. (A)** Absolute number of murine HSC in the BM of non-transplanted mice (n=5) or mice engrafted with AML patient-derived cells (AML6, n=4; AML9, n=5), as depicted. Data are shown as mean  $\pm$  s.e.m. **(B)** Absolute number of murine HSC in the BM of non-transplanted mice (n=4) or mice engrafted with murine MLL-ENL leukemia (n=5), as depicted. Data are shown as mean  $\pm$  s.e.m. **(C)** Schematic of the experiment. Residual murine CD45.1 cells in the BM of mice engrafted with AML6 patient-derived cells and treated with AraC or combination of AraC and NO inhibitors were transplanted i.v. in sub-lethally irradiated *Rag2-KO/GammaC-KO* CD45.2 recipient mice. Engraftment was assessed 8 weeks after transplantation (see Figure 7E-G). **(D)** Percentage of hCD45<sup>+</sup> cells in the peripheral blood of mice described in Figure 7H. Data are shown as mean  $\pm$  s.e.m. **(E)** Absolute number of hCD45<sup>+</sup> cells in the BM of mice described in Figure 7H. Data are shown as mean  $\pm$  s.e.m. **(F)** Percentage of HSPC in the different phase of cell cycle in the BM of mice in Figure 7H. Data are shown as mean  $\pm$  s.e.m. p values: \* p<0.05; \*\*p<0.01; \*\*\*\* p<0.0001.
